# Supplementary material for: Beta-arrestin 1 regulation of reward-motivated behaviors and glutamatergic function
Source: PLoS One. 2017 Oct 3;12(10):e0185796. doi: 10.1371/journal.pone.0185796 (PMC5626489; doi:10.1371/journal.pone.0185796)
Supplement: S1 Table — (DOCX) [file pone.0185796.s001.docx]

**S1 Table. The number of mice removed from each stage of the cocaine IVSA experiment**. The number of animals that lost patency (a), failed to reach the acquisition scriteria(b), or were removed for electrophysiology studies(c), are reported below. The numbers in parentheses represent the number of subjects at the beginning of each of these experimental stages.

|  | FR1 before day 5 | FR1 after day 5 | FR2 | FR5 | Extinction |
| --- | --- | --- | --- | --- | --- |
| WT mice (26) | 4a (22) | 0a (22) | 6a 2b (14) | 1a (13) | 9c (4) |
| KO mice (23) | 2a (21) | 2a (19) | 5a 2b (13) | 2a (11) | 5c (6) |
